# Supplementary material for: Development, biological evaluation, and molecular modelling of some benzene-sulfonamide derivatives as protein tyrosine phosphatase-1B inhibitors for managing diabetes mellitus and associated metabolic disorders
Source: Royal Society of Chemistry journal article supplement (doi:10.1039/d4md00594e), 2024-10-23
Supplement: d4md00594e1.pdf [file d4md00594e1.pdf]

## Supplementary Information

# Development, Biological Evaluation, and Molecular Modelling of Some Benzene-sulfonamide Derivatives as Protein Tyrosine Phosphatase-1B Inhibitors for Managing Diabetes Mellitus and Associated Metabolic Disorders

Nagat Ghareb <sup>a</sup>, Khaled M. Darwish <sup>b, c</sup>, Mohamed S. Nafie <sup>d, e</sup>, Ranwa Elrayess <sup>f</sup>, Noha M. Abourobe  
<sup>g</sup>, Shaimaa A. Fattah <sup>h</sup>, Reem M. Hazem <sup>i</sup>, Eman T. Mehanna <sup>h</sup>, Ranza Elrayess <sup>a, j\*</sup>

<sup>a</sup> Department of Pharmaceutical Organic Chemistry, Faculty of Pharmacy, Suez Canal University, Ismailia 41522, Egypt

<sup>b</sup> Department of Medicinal Chemistry, Faculty of Pharmacy, Suez Canal University, Ismailia 41522, Egypt.

<sup>c</sup> Department of Medicinal Chemistry, Faculty of Pharmacy, Galala University, New Galala 43713, Egypt

<sup>d</sup> Department of Chemistry, College of Sciences, University of Sharjah, Sharjah, 27272, United Arab Emirates.

<sup>e</sup> Department of Chemistry, Faculty of Science, Suez Canal University, Ismailia 41522, Egypt

<sup>f</sup> Department of Zoology, Faculty of Science, Suez Canal University, Ismailia 41522, Egypt

<sup>g</sup> Department of Pharmaceutics, Faculty of Pharmacy, Suez Canal University, Ismailia 41522, Egypt.

<sup>h</sup> Department of Biochemistry, Faculty of Pharmacy, Suez Canal University, Ismailia 41522, Egypt.

<sup>i</sup> Department of Pharmacology and Toxicology, Faculty of Pharmacy, Suez Canal University, Ismailia 41522, Egypt.

<sup>j</sup> College of Pharmacy, Al-Ayen University, Thi-Qar, Iraq.

### \* Correspondence:

[Ranza.el-rayes@pharm.suez.edu.eg](mailto:Ranza.el-rayes@pharm.suez.edu.eg) (R.E); Tel.: +20-102 548 8849; Fax: +20-064-3230741

## Supplementary Information

### List of figures

| Title                                                                                                                                                            | Page         |
|------------------------------------------------------------------------------------------------------------------------------------------------------------------|--------------|
| <b><sup>1</sup>H NMR and <sup>13</sup>C NMR spectral data of the target compounds (3a-c and 4a-c)</b>                                                            | <b>4-15</b>  |
| <b>Fig. S1.</b> <sup>1</sup> H-NMR of compound 3a                                                                                                                | <b>4</b>     |
| <b>Fig. S2.</b> <sup>13</sup> C-NMR of compound 3a                                                                                                               | <b>5</b>     |
| <b>Fig. S3.</b> <sup>1</sup> H-NMR of compound 3b                                                                                                                | <b>6</b>     |
| <b>Fig. S4.</b> <sup>13</sup> C-NMR of compound 3b                                                                                                               | <b>7</b>     |
| <b>Fig. S5.</b> <sup>1</sup> H-NMR of compound 3c                                                                                                                | <b>8</b>     |
| <b>Fig. S6.</b> <sup>13</sup> C-NMR of compound 3c                                                                                                               | <b>9</b>     |
| <b>Fig. S7.</b> <sup>1</sup> H-NMR of compound 4a                                                                                                                | <b>10</b>    |
| <b>Fig. S8.</b> <sup>13</sup> C-NMR of compound 4a                                                                                                               | <b>11</b>    |
| <b>Fig. S9.</b> <sup>1</sup> H-NMR of compound 4b                                                                                                                | <b>12</b>    |
| <b>Fig. S10.</b> <sup>13</sup> C-NMR of compound 4b                                                                                                              | <b>13</b>    |
| <b>Fig. S11.</b> <sup>1</sup> H-NMR of compound 4c                                                                                                               | <b>14</b>    |
| <b>Fig. S12.</b> <sup>13</sup> C-NMR of compound 4c                                                                                                              | <b>15</b>    |
| <b>Fig.S13-S17 Elemental analysis of target compounds 3a-c and 4a-c</b>                                                                                          | <b>16-20</b> |
| <b>Mass spectral data of the target compounds (3b-c and 4a-b)</b>                                                                                                | <b>21-24</b> |
| <b>Fig. S18.</b> Mass spectrum of compound 3b                                                                                                                    | <b>21</b>    |
| <b>Fig. S19.</b> Mass spectrum of compound 3c                                                                                                                    | <b>22</b>    |
| <b>Fig. S20.</b> Mass spectrum of compound 4a                                                                                                                    | <b>23</b>    |
| <b>Fig. S21.</b> Mass spectrum of compound 4b                                                                                                                    | <b>24</b>    |
| <b>Fig. S22.</b> Dose-response curve for the PTB1B protein inhibition at the serial concentrations of 0.01-10 $\mu$ M compared to pioglitazone (PGZ)             | <b>25</b>    |
| <b>Fig. S23.</b> Binding-free energy of compound/PTP1B complexes as per MM_PBSA calculations                                                                     | <b>26-27</b> |
| <b>Fig. S24.</b> Chart of particle size and polydispersity index of the nano dispersion                                                                          | <b>27</b>    |
| <b>Fig. S25.</b> TEM imaging of the dispersion, showing on the left the size range suggested, on the right a wider display of the particle shape and uniformity. | <b>28</b>    |
| <b>Fig. S26.</b> The microscopic damage score for liver of all experimental groups                                                                               | <b>29</b>    |
| <b>Fig. S27.</b> Results of kidney tissue histopathological examination                                                                                          | <b>30-31</b> |

## Supplementary Information

### List of tables

| Title                                                                                                                           | Page      |
|---------------------------------------------------------------------------------------------------------------------------------|-----------|
| <b>Table S1.</b> Combining two different oils with surfactants                                                                  | <b>32</b> |
| <b>Table S2.</b> Primer sequences used in the present study.                                                                    | <b>32</b> |
| <b>Table S3.</b> The effect of the synthesized compounds on the markers of liver and kidney functions in the experimental rats. | <b>32</b> |

## Supplementary Information

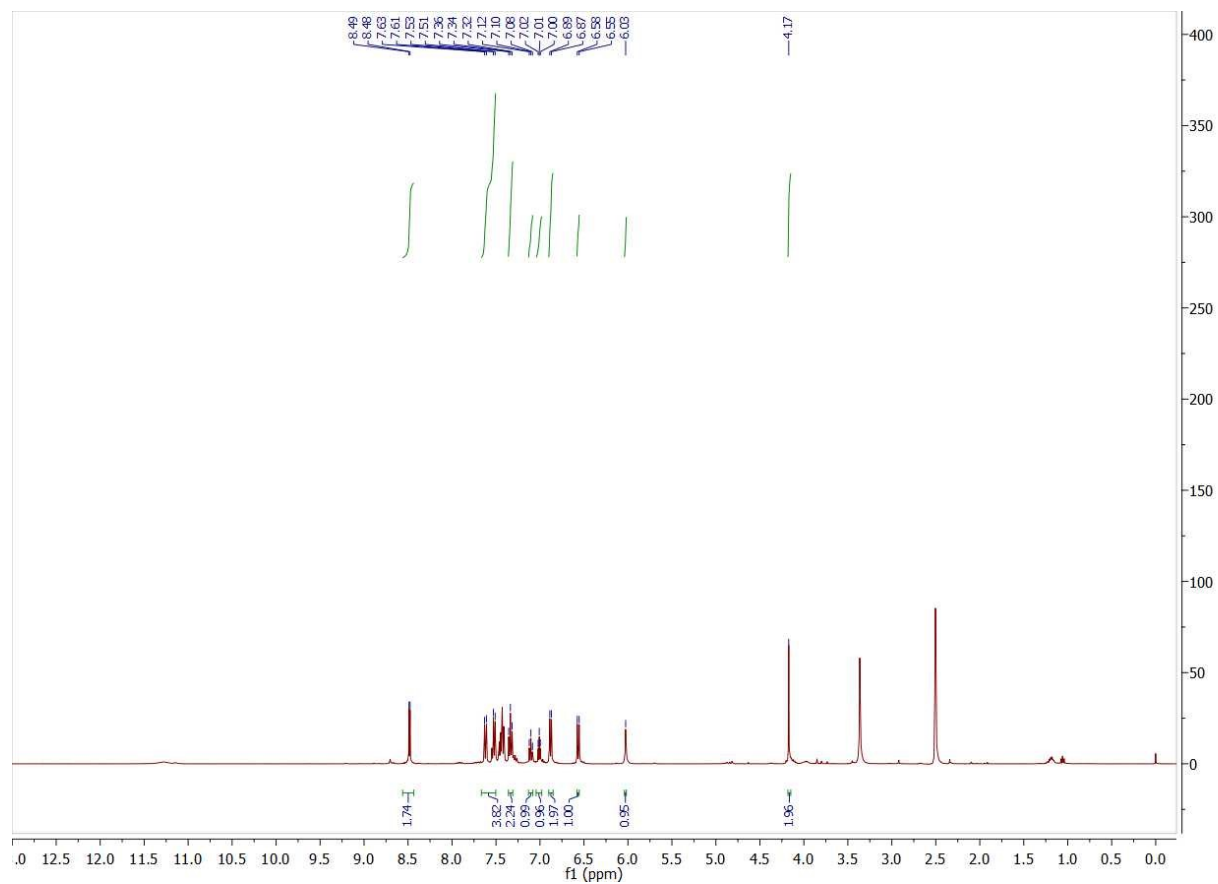

**Fig. S1. <sup>1</sup>H-NMR of compound 3a**

## Supplementary Information

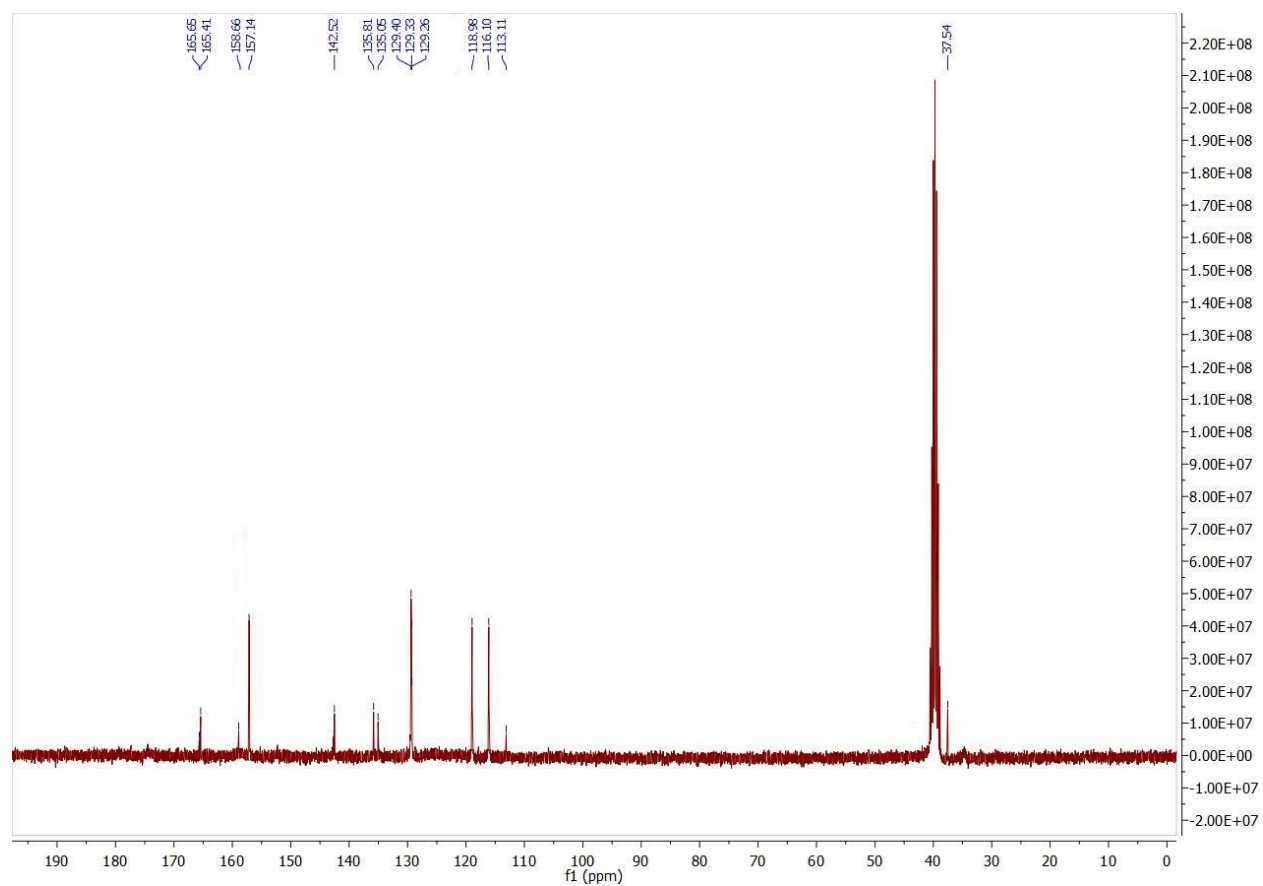

Fig. S2.  $^{13}\text{C}$ -NMR of compound 3a

## Supplementary Information

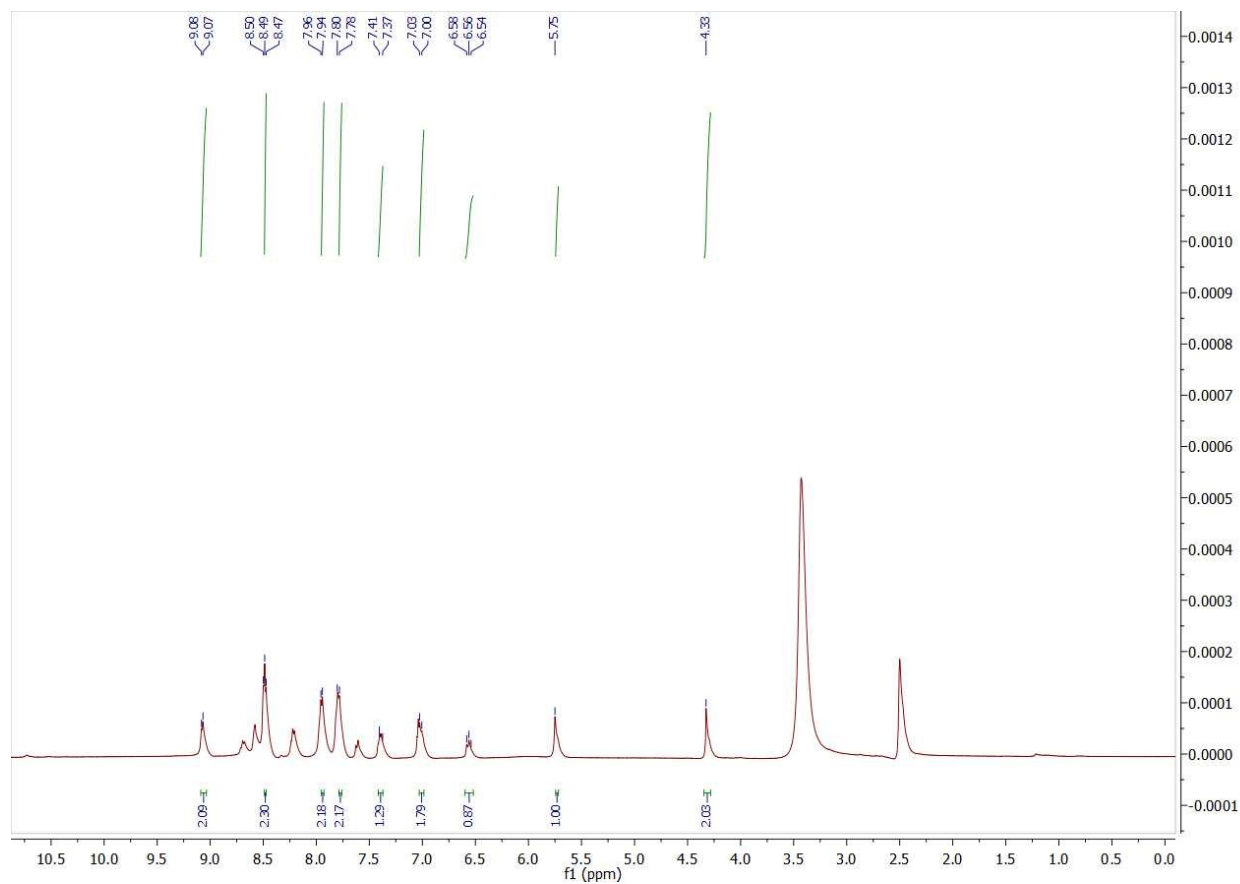

**Fig. S3. <sup>1</sup>H-NMR of compound 3b**

## Supplementary Information

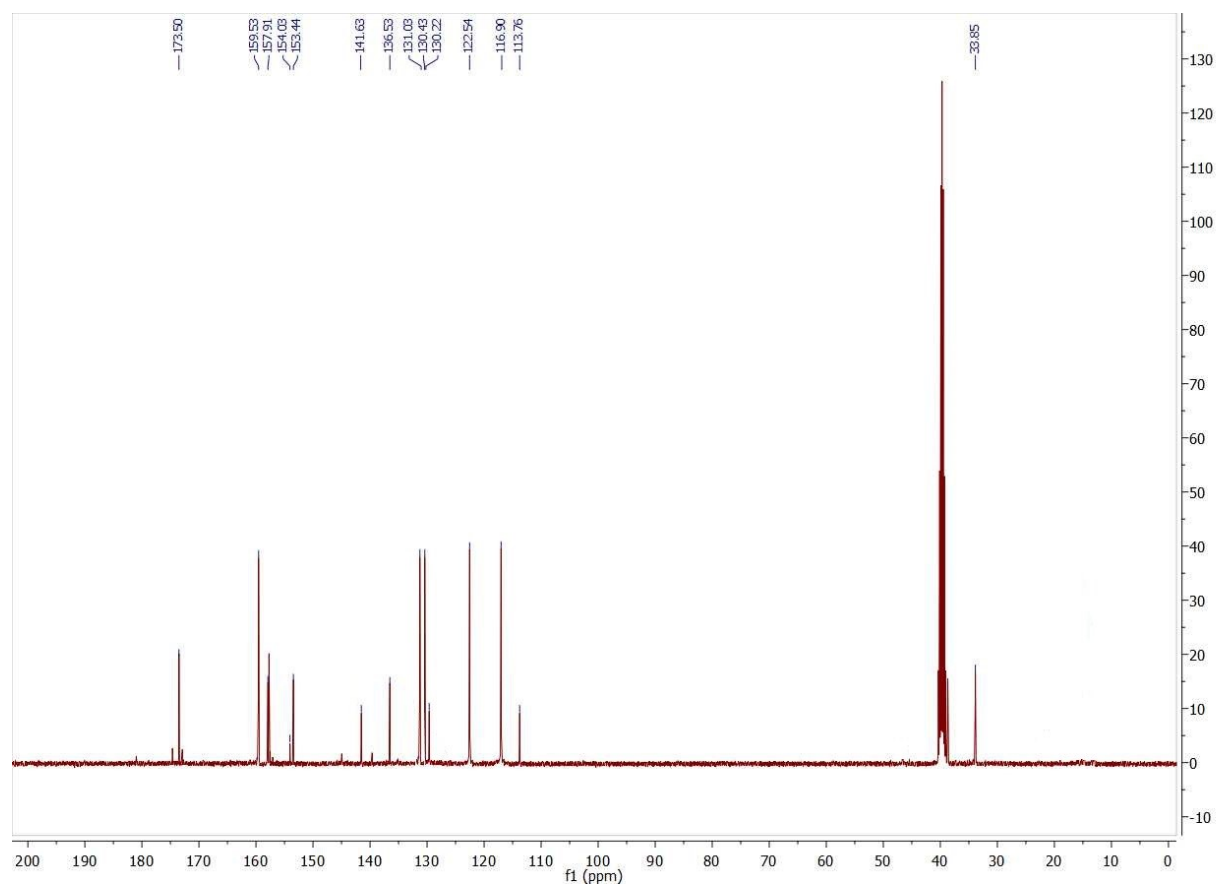

**Fig. S4.**  $^{13}\text{C}$ -NMR of compound 3b

## Supplementary Information

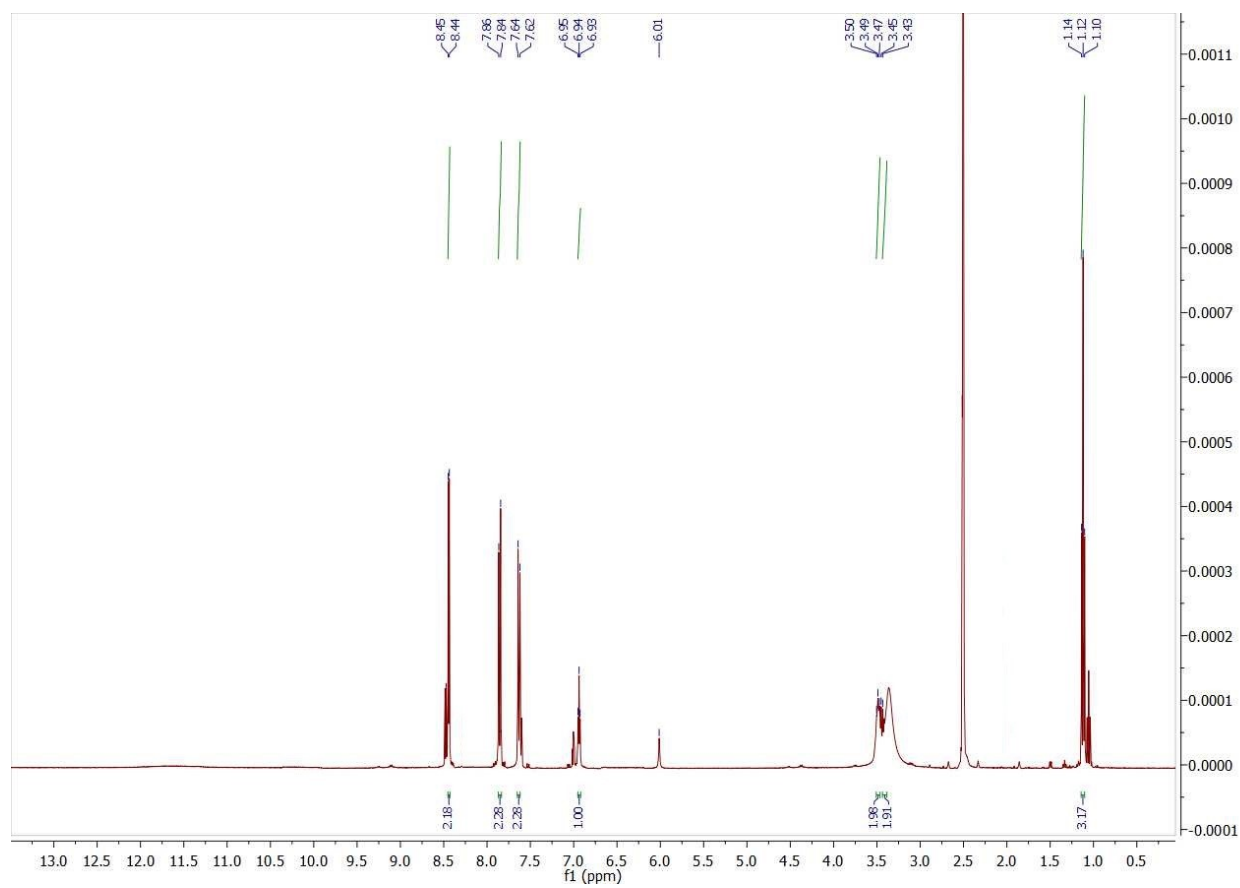

Fig. S5. <sup>1</sup>H-NMR of compound 3c



## Supplementary Information

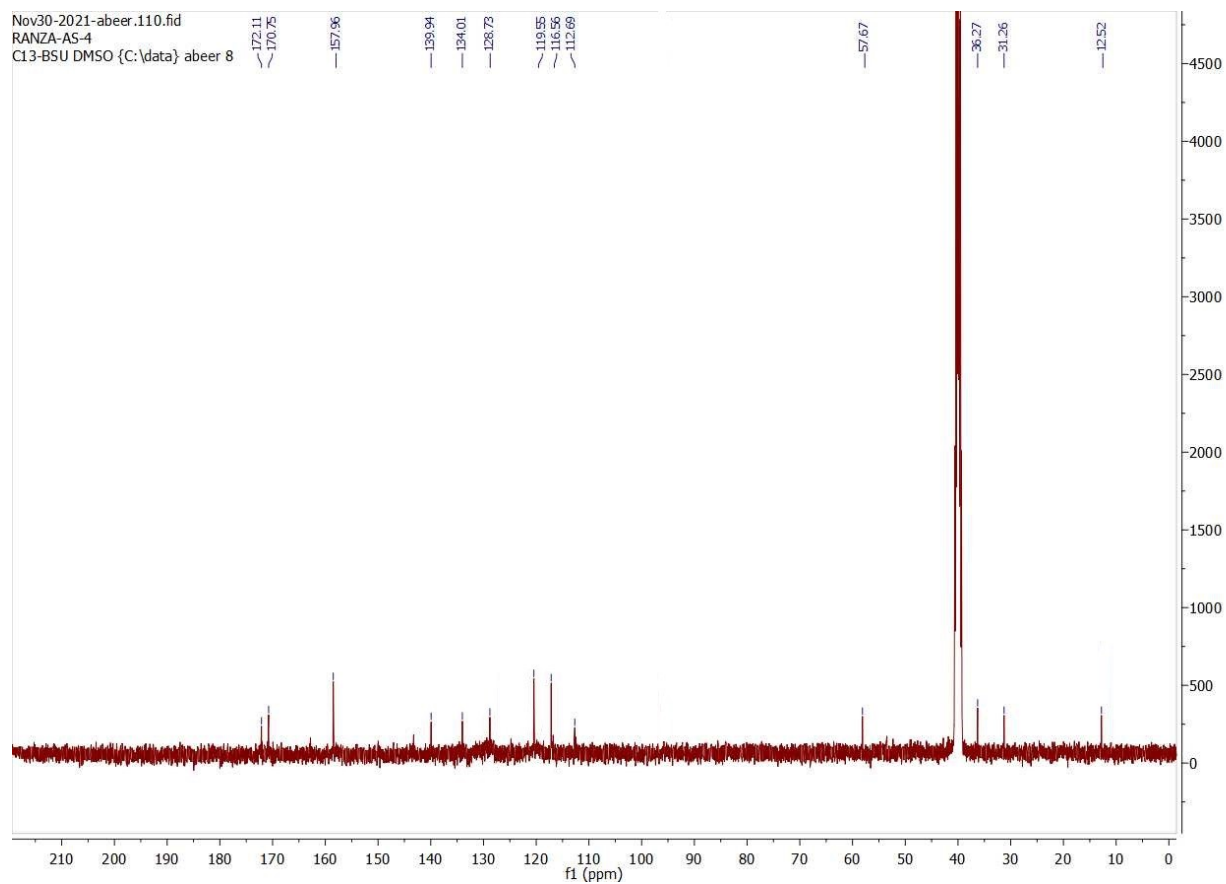

**Fig. S6.**  $^{13}\text{C}$ -NMR of compound **3c**



## Supplementary Information

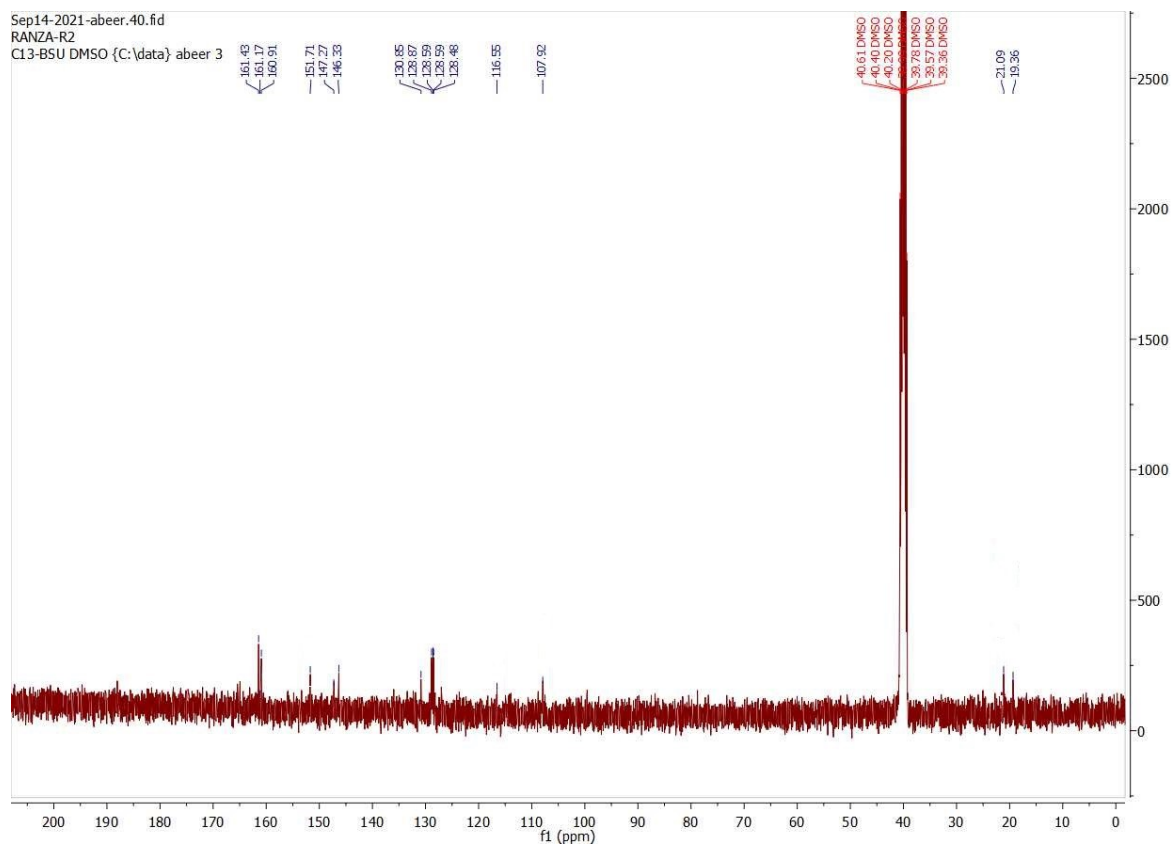

Fig. S8.  $^{13}\text{C}$ -NMR of compound 4a

## Supplementary Information

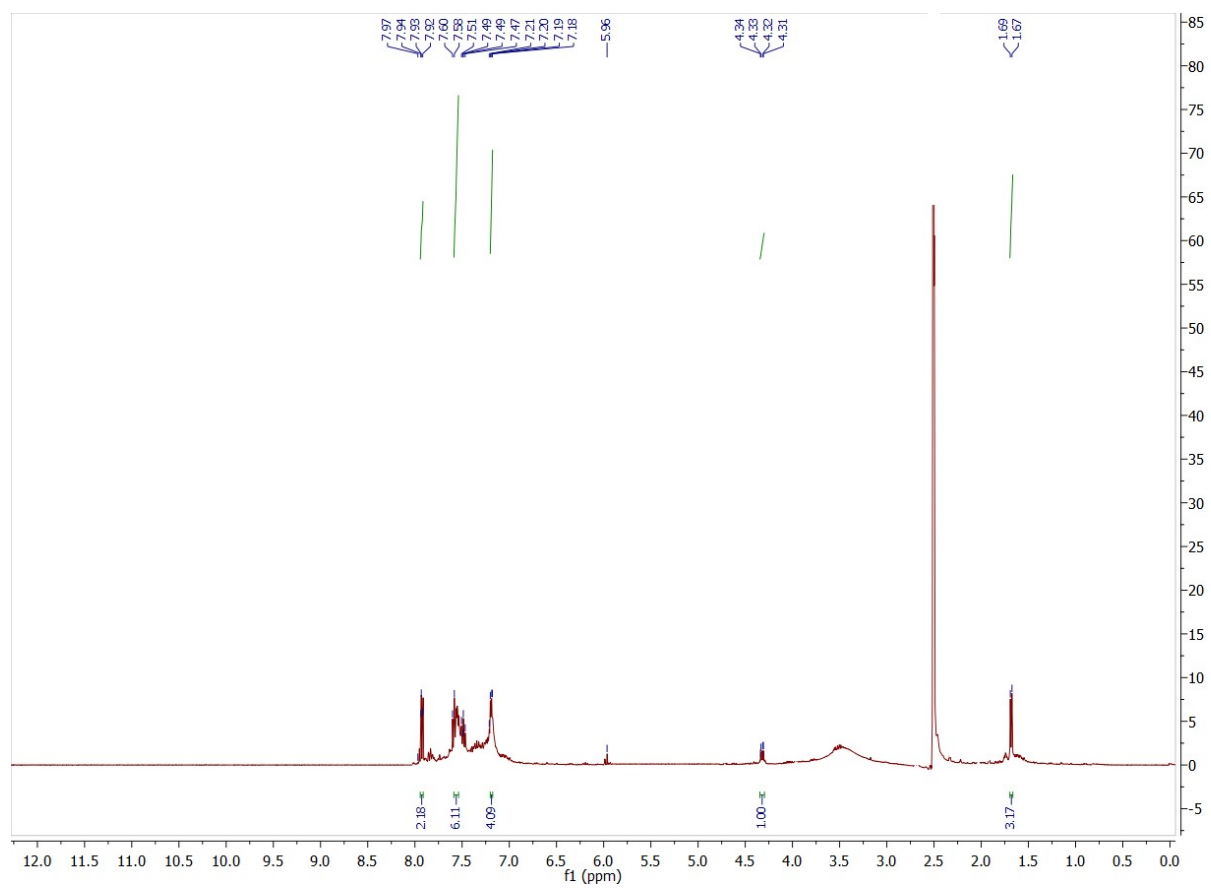

**Fig. S9.**  $^1\text{H-NMR}$  of compound **4b**

## Supplementary Information

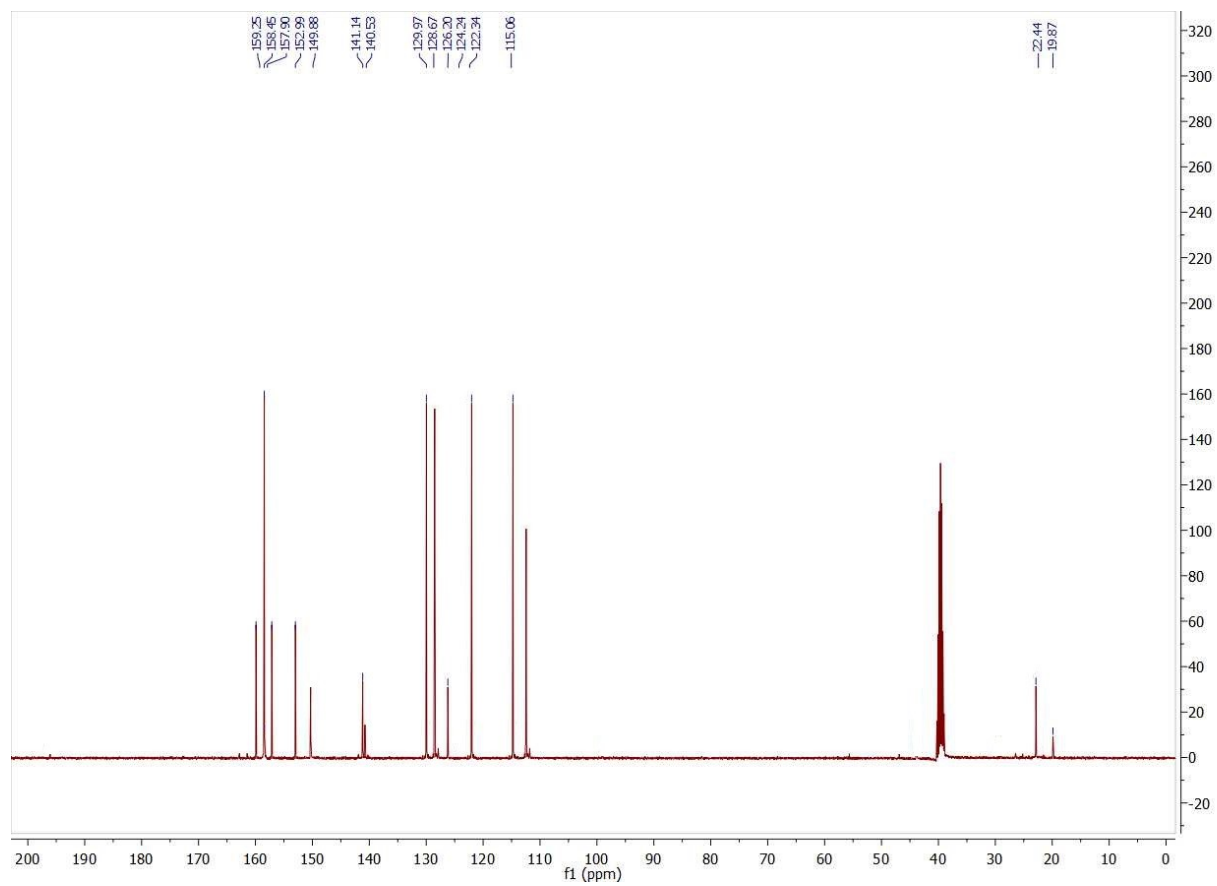

**Fig. S10.**  $^{13}\text{C}$ -NMR of compound 4b

## Supplementary Information

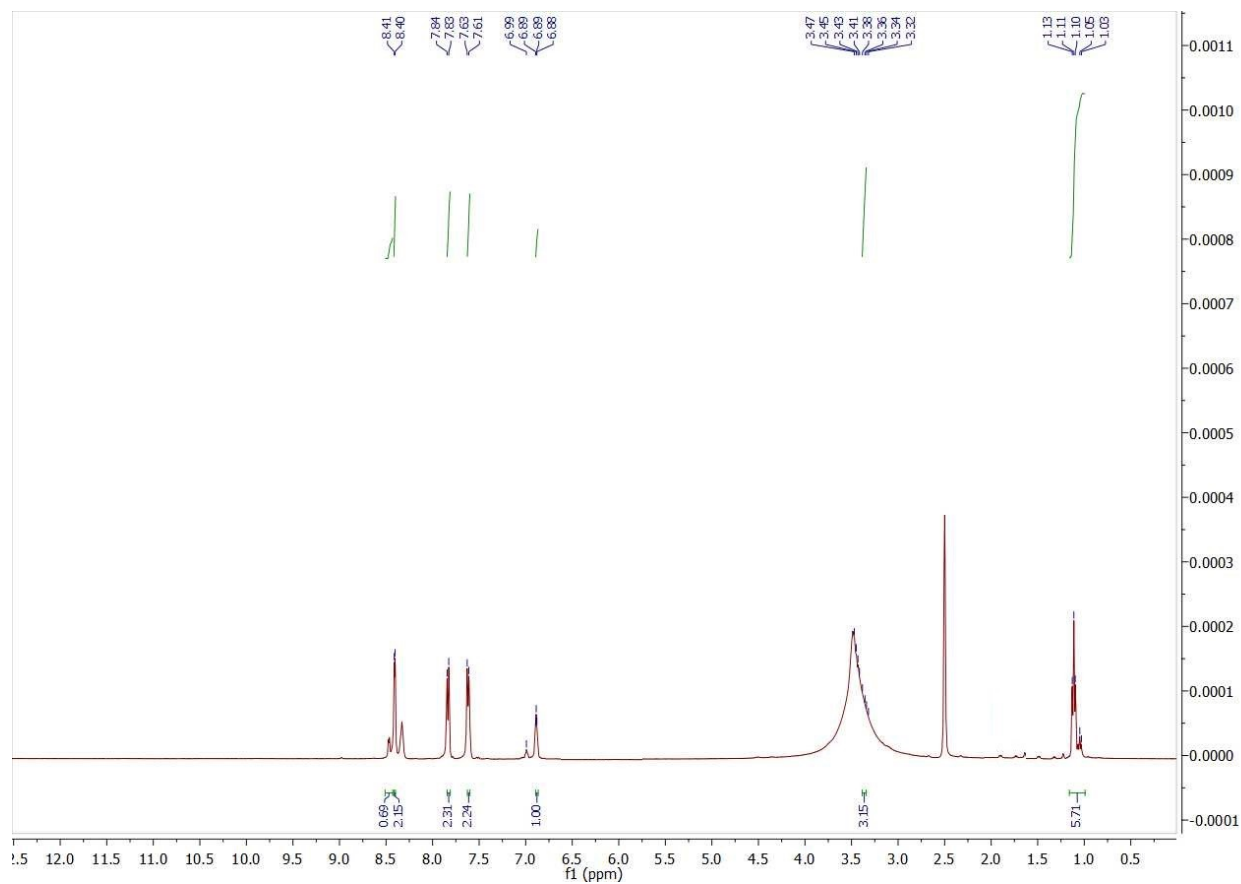

**Fig. S11.** <sup>1</sup>H-NMR of compound 4c

## Supplementary Information

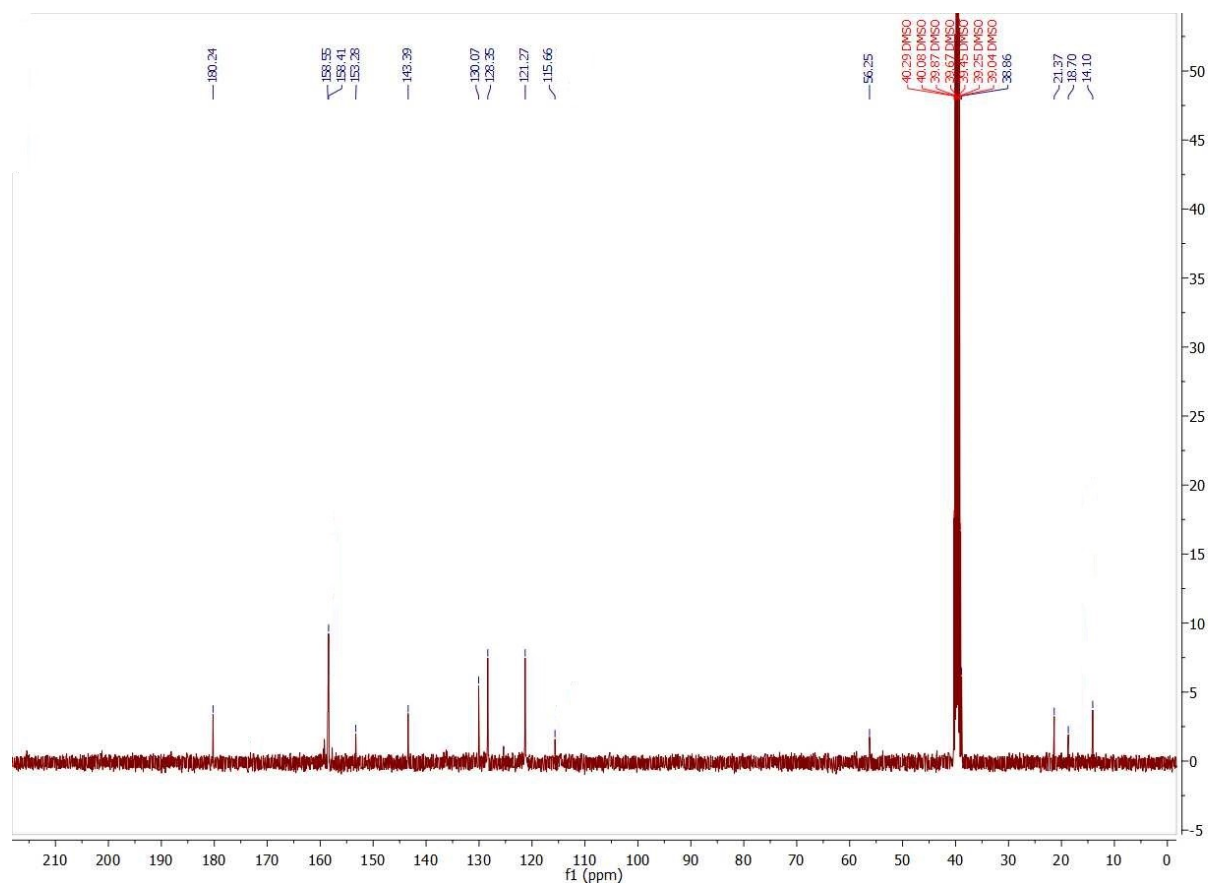

Fig. S12.  $^{13}\text{C}$ -NMR of compound 4c

## Supplementary Information

|             |     |     |     |     |      |      |
|-------------|-----|-----|-----|-----|------|------|
| Sample code | 4SD | 5SD | 6SD | 7SD | 30SD | 31SD |
| Paper code  | 3a  | 3b  | 4a  | 4b  | 3c   | 4c   |

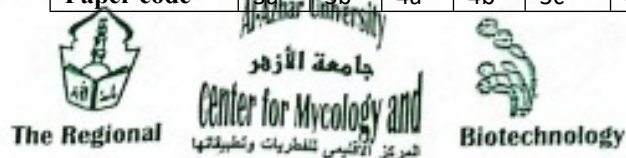

**Requester Data:**

Name: Dr. Naggall

**Sample Data:**

Eleven samples had been submitted for elemental analysis.

**Analysis Report:**

| Sample Code | C%    | H%   | N%    | S%    |
|-------------|-------|------|-------|-------|
| 30 SD       | 47.46 | 4.31 | 18.79 | 16.77 |
| 49 B        | 68.71 | 7.32 | 24.75 | -     |
| 6 B         | 67.49 | 5.99 | 22.74 | -     |
| 30 B        | 62.46 | 4.69 | 32.83 | -     |
| 42 B        | 68.56 | 5.75 | 9.43  | 11.20 |
| 25 SD       | 56.63 | 3.64 | 13.52 | 7.67  |
| 55 B        | 65.19 | 5.27 | 13.66 | -     |
| 33 B        | 69.18 | 4.65 | 20.54 | -     |
| 19 B        | 68.71 | 5.32 | 15.72 | 7.07  |
| 40 B        | 55.36 | 3.88 | 8.49  | 9.41  |
| 12 B        | 81.56 | 4.74 | 14.51 | -     |

INVESTIGATOR

*M. S2*

DIRECTOR

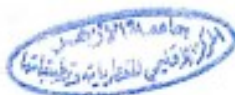

|                                                   |                       |
|---------------------------------------------------|-----------------------|
| Director : Prof. A.A. Razak, Ph.D., London Univ., | Tel: 00202 2633121    |
| Postal address:                                   | Evening 00202 4012930 |
| P.O. Box: 8104-Nasr City 11371 Cairo - Egypt      | Fax: 00202 2633121    |

**Fig.S13. Elemental analysis of target compounds 3a-c and 4a-c**

|             |     |     |     |     |      |      |
|-------------|-----|-----|-----|-----|------|------|
| Sample code | 4SD | 5SD | 6SD | 7SD | 30SD | 31SD |
|-------------|-----|-----|-----|-----|------|------|



## Supplementary Information

|            |    |    |    |    |    |    |
|------------|----|----|----|----|----|----|
| Paper code | 3a | 3b | 4a | 4b | 3c | 4c |
|------------|----|----|----|----|----|----|



**Requester Data:**  
Name: Dr. Naggatt

**Sample Data:**  
Eleven samples had been submitted for elemental analysis.

**Analysis Report:**

| Sample Code | C%    | H%   | N%    | S%    |
|-------------|-------|------|-------|-------|
| 21 SD       | 58.56 | 5.34 | 18.64 | 7.17  |
| 10 SD       | 61.81 | 4.22 | 14.70 | 13.20 |
| 8 B         | 51.64 | 3.52 | 18.68 | -     |
| 29 SD       | 51.33 | 3.49 | 15.09 | 8.60  |
| 17 SD       | 49.57 | 4.37 | 19.14 | 8.81  |
| 31 SD       | 49.38 | 4.69 | 17.56 | 16.55 |
| 7 B         | 58.72 | 3.99 | 21.81 | -     |
| 36 B        | 54.54 | 3.62 | 8.75  | 9.66  |
| 8 SD        | 54.34 | 3.91 | 15.65 | 14.52 |
| 13 SD       | 55.72 | 3.97 | 17.32 | 7.84  |
| 47 B        | 66.35 | 3.71 | 19.55 | -     |

**INVESTIGATOR**  


**DIRECTOR**  


Director : Prof. A.A. Razak, Ph.D., London Univ.,  
Postal address:  
P.O. Box: 8104-Nasr City 11371 Cairo - Egypt

Tel: 00202 2633121  
Evening 00202 4012930  
Fax: 00202 2633121

Fig.S14. Elemental analysis of target compounds 3a-c and 4a-c

## Supplementary Information

|             |     |     |     |     |      |      |
|-------------|-----|-----|-----|-----|------|------|
| Sample code | 4SD | 5SD | 6SD | 7SD | 30SD | 31SD |
| Paper code  | 3a  | 3b  | 4a  | 4b  | 3c   | 4c   |



The Regional University of Al-Azhar  
Center for Mycology and Biotechnology  
المركز الأقليمي للفطريات وتطبيقاتها

**Requester Data:**  
Name: Dr. Naggatt

**Sample Data:**  
Twelve samples had been submitted for elemental analysis.

**Analysis Report:**

| Sample Code | C%    | H%   | N%    | S%    |
|-------------|-------|------|-------|-------|
| 6 SD        | 54.82 | 3.39 | 16.07 | 14.76 |
| 15 SD       | 53.29 | 3.38 | 16.15 | 15.11 |
| 57 B        | 60.82 | 4.91 | 12.54 | 14.57 |
| 30 SD       | 47.46 | 4.06 | 18.39 | 16.57 |
| 18 B        | 64.72 | 5.63 | 17.65 | 8.27  |
| 27 SD       | 56.62 | 4.02 | 18.59 | 8.61  |
| 39 B        | 68.34 | 5.09 | 9.71  | 11.43 |
| 22 SD       | 56.52 | 4.46 | 22.31 | 8.54  |
| 11 SD       | 63.64 | 4.16 | 14.73 | 6.92  |
| 43 B        | 61.41 | 4.52 | 13.72 | 10.47 |
| 11 B        | 72.62 | 3.92 | 12.68 | -     |
| 12 SD       | 53.51 | 3.86 | 16.37 | 15.25 |

**INVESTIGATOR**



**DIRECTOR**



Director : Prof. A.A. Razak, Ph.D., London Univ.,  
Postal address:  
P.O. Box: 8104-Nasr City 11371 Cairo - Egypt

Tel: 00202 2633121  
Evening 00202 4012930  
Fax: 00202 2633121

**Fig.S15. Elemental analysis of target compounds 3a-c and 4a-c**

## Supplementary Information

|             |     |     |     |     |      |      |
|-------------|-----|-----|-----|-----|------|------|
| Sample code | 4SD | 5SD | 6SD | 7SD | 30SD | 31SD |
| Paper code  | 3a  | 3b  | 4a  | 4b  | 3c   | 4c   |



The Regional Center for Mycology and Biotechnology  
المركز الأقليمي للفطريات وتطبيقاتها

**Requester Data:**

Name: Dr. Naggatt

**Sample Data:**

Twelve samples had been submitted for elemental analysis.

**Analysis Report:**

| Sample Code | C%    | H%    | N%    | S%    |
|-------------|-------|-------|-------|-------|
| 20 SD       | 58.53 | 3.39  | 12.08 | 7.14  |
| BB          | 77.46 | 4.45  | 13.81 | -     |
| 19 SD       | 43.62 | 3.39  | 31.41 | 8.64  |
| 34 SD       | 56.34 | 16.44 | 16.44 | -     |
| 10 B        | 76.82 | 4.33  | 19.38 | -     |
| 50 B        | 58.48 | 3.96  | 13.45 | 15.79 |
| 20 CD       | 82.51 | 5.97  | 21.28 | 8.40  |
| 48 B        | 72.64 | 5.26  | 15.83 | -     |
| 32 B        | 70.60 | 4.85  | 19.52 | -     |
| 34 CD       | 47.42 | 4.30  | 18.52 | 16.79 |
| 14 B        | 64.40 | 3.39  | 11.52 | -     |
| 56 B        | 58.67 | 4.24  | 13.48 | 15.57 |

**INVESTIGATOR**



**DIRECTOR**



Director : Prof. A.A. Razak, Ph.D., London Univ.,

Postal address:

P.O. Box: 8104, Near City, 11771, Cairo, Egypt

Tel: 00202 2633121

Evening 00202 4012930

**Fig.S16. Elemental analysis of target compounds 3a-c and 4a-c**

## Supplementary Information

|             |     |     |     |     |      |      |
|-------------|-----|-----|-----|-----|------|------|
| Sample code | 4SD | 5SD | 6SD | 7SD | 30SD | 31SD |
| Paper code  | 3a  | 3b  | 4a  | 4b  | 3c   | 4c   |



The Regional Center for Mycology and Biotechnology  
المركز الأقليمي للفطريات وتطبيقاتها

**Requester Data:**

Name: Dr. Naggatt

**Sample Data:**

Eleven samples had been submitted for elemental analysis.

**Analysis Report:**

| Sample Code        | C%    | H%   | N%    | S%    |
|--------------------|-------|------|-------|-------|
| 28 SD              | 50.73 | 2.55 | 19.70 | 9.02  |
| 16 SD              | 55.75 | 3.67 | 17.13 | 7.79  |
| 26 SD              | 75.02 | 3.41 | 16.48 | 7.59  |
| 4 SD               | 68.76 | 4.53 | 26.57 | -     |
| 5 SD               | 55.52 | 3.31 | 17.38 | 7.64  |
| 33 SD              | 57.32 | 4.42 | 16.03 | 14.34 |
| 24 SD              | 44.43 | 3.35 | 20.19 | 18.02 |
| 4 SD               | 53.28 | 3.58 | 16.71 | 15.22 |
| 41 <del>SD</del> B | 61.51 | 4.52 | 13.67 | 10.66 |
| 31 <del>SD</del> B | 62.62 | 3.81 | 22.63 | -     |
| 7 SD               | 56.38 | 4.16 | 16.79 | 7.71  |

**INVESTIGATOR**



**DIRECTOR**



Director : Prof. A.A. Razak, Ph.D., London Univ.,  
Postal address:  
P.O. Box: 8104-Nasr City 11371 Cairo - Egypt

Tel: 00202 2633121  
Evening 00202 4012930  
Fax: 00202 2633121

**Fig.17 Elemental analysis of target compounds 3a-c and 4a-c**

## Supplementary Information

Figure S18. Mass spectrum of compound 3b

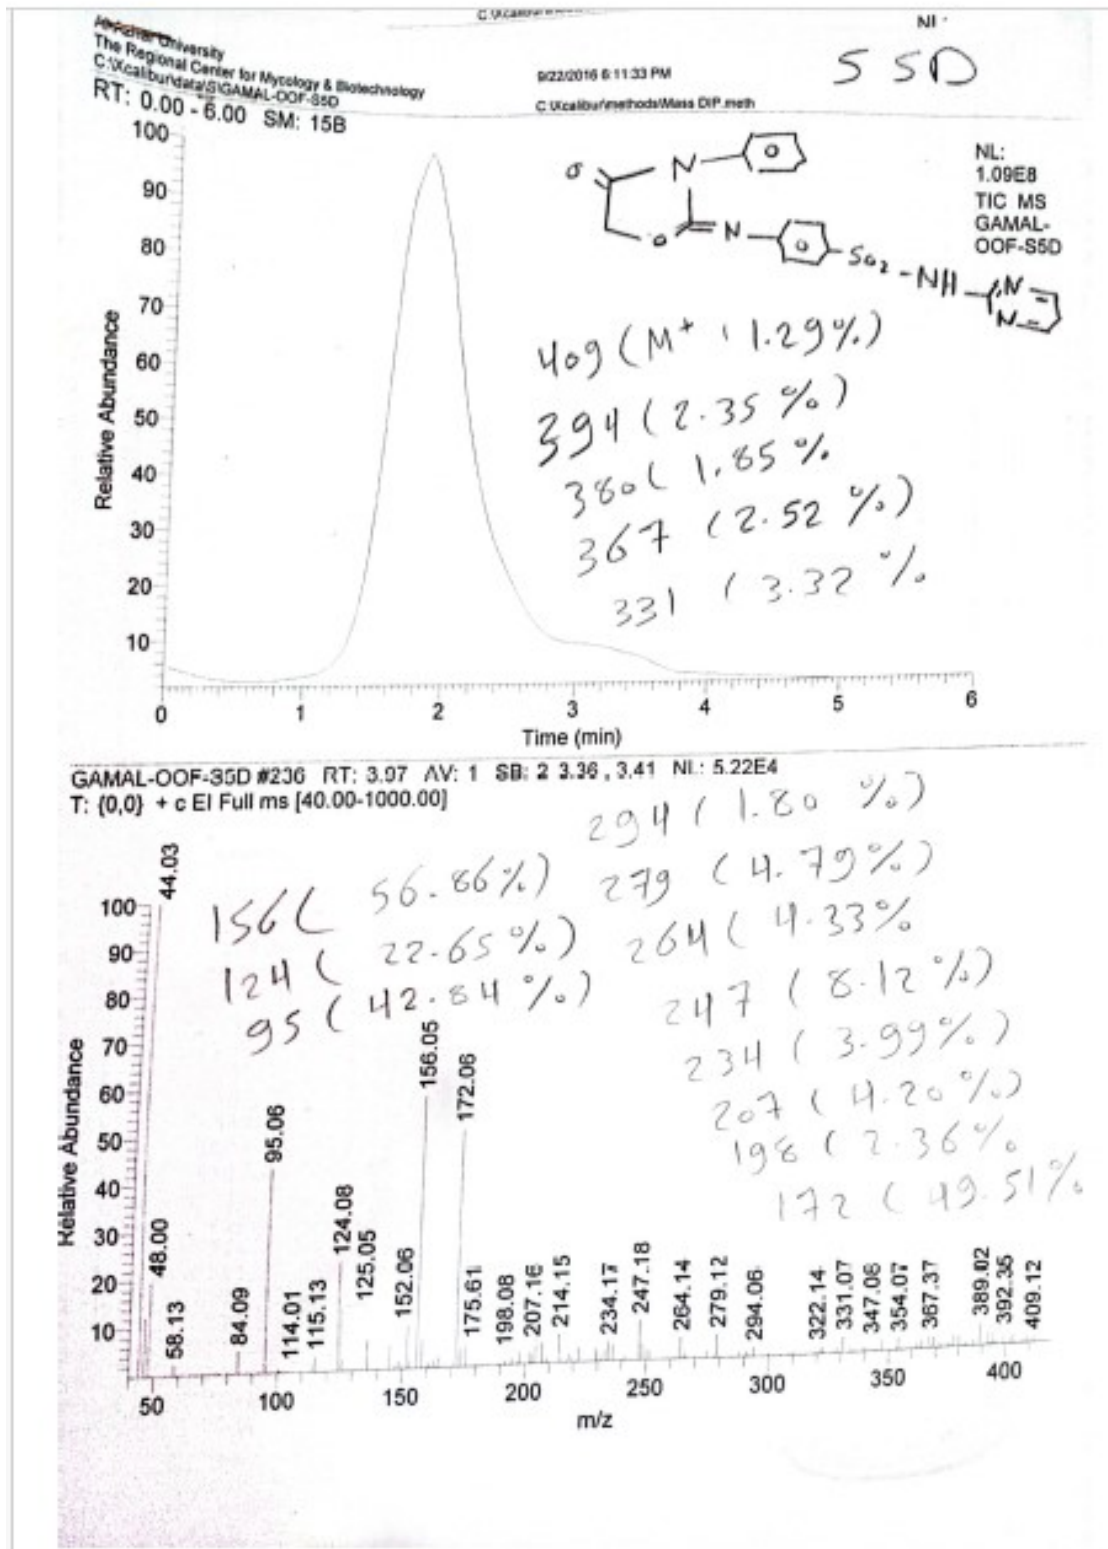

# Supplementary Information

Figure S19. Mass spectrum of compound 3c

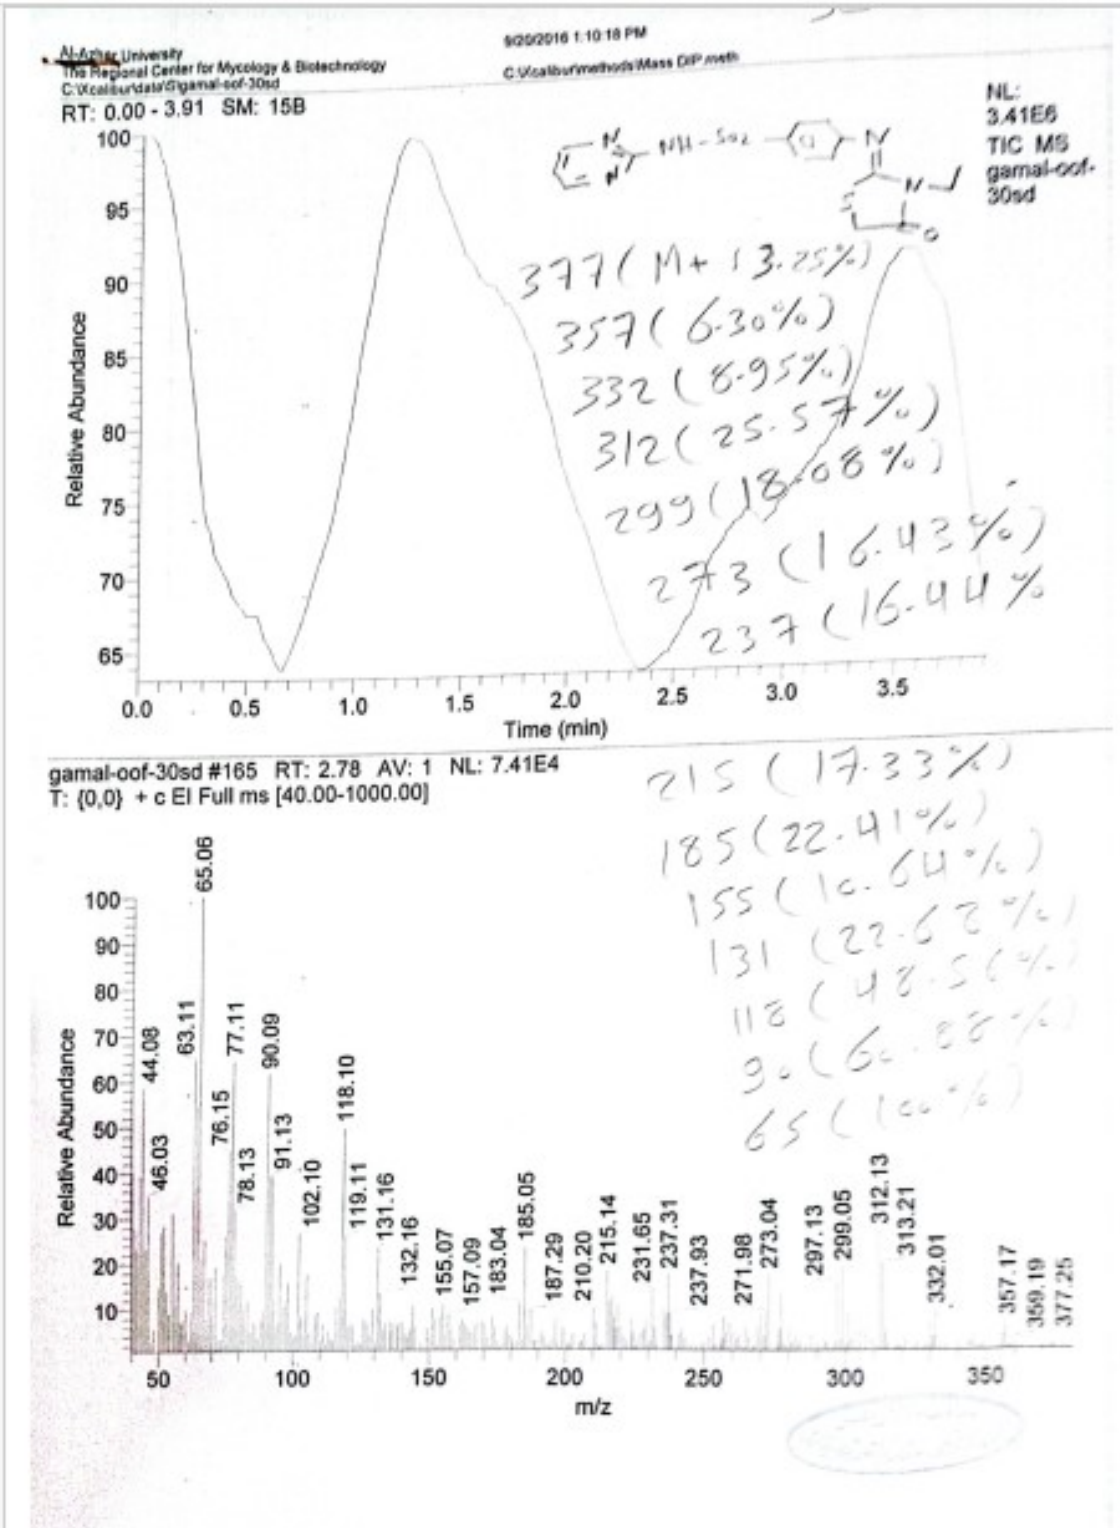

# Supplementary Information

Figure S20. Mass spectrum of compound 4a

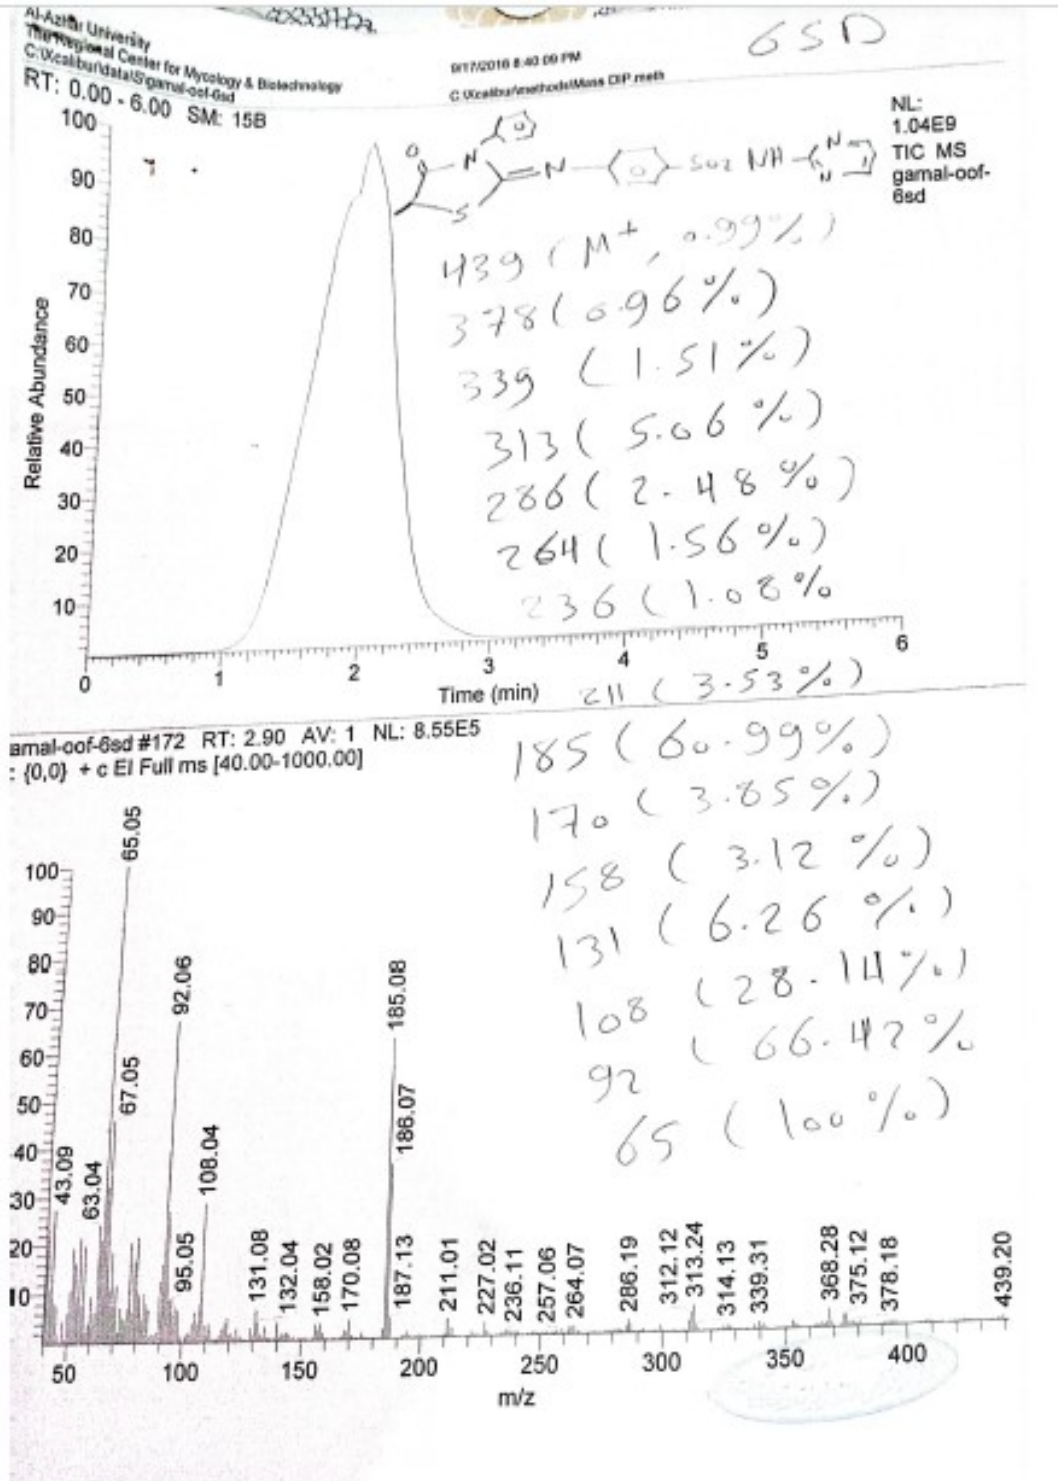

## Supplementary Information

Figure S21. Mass spectrum of compound 4b

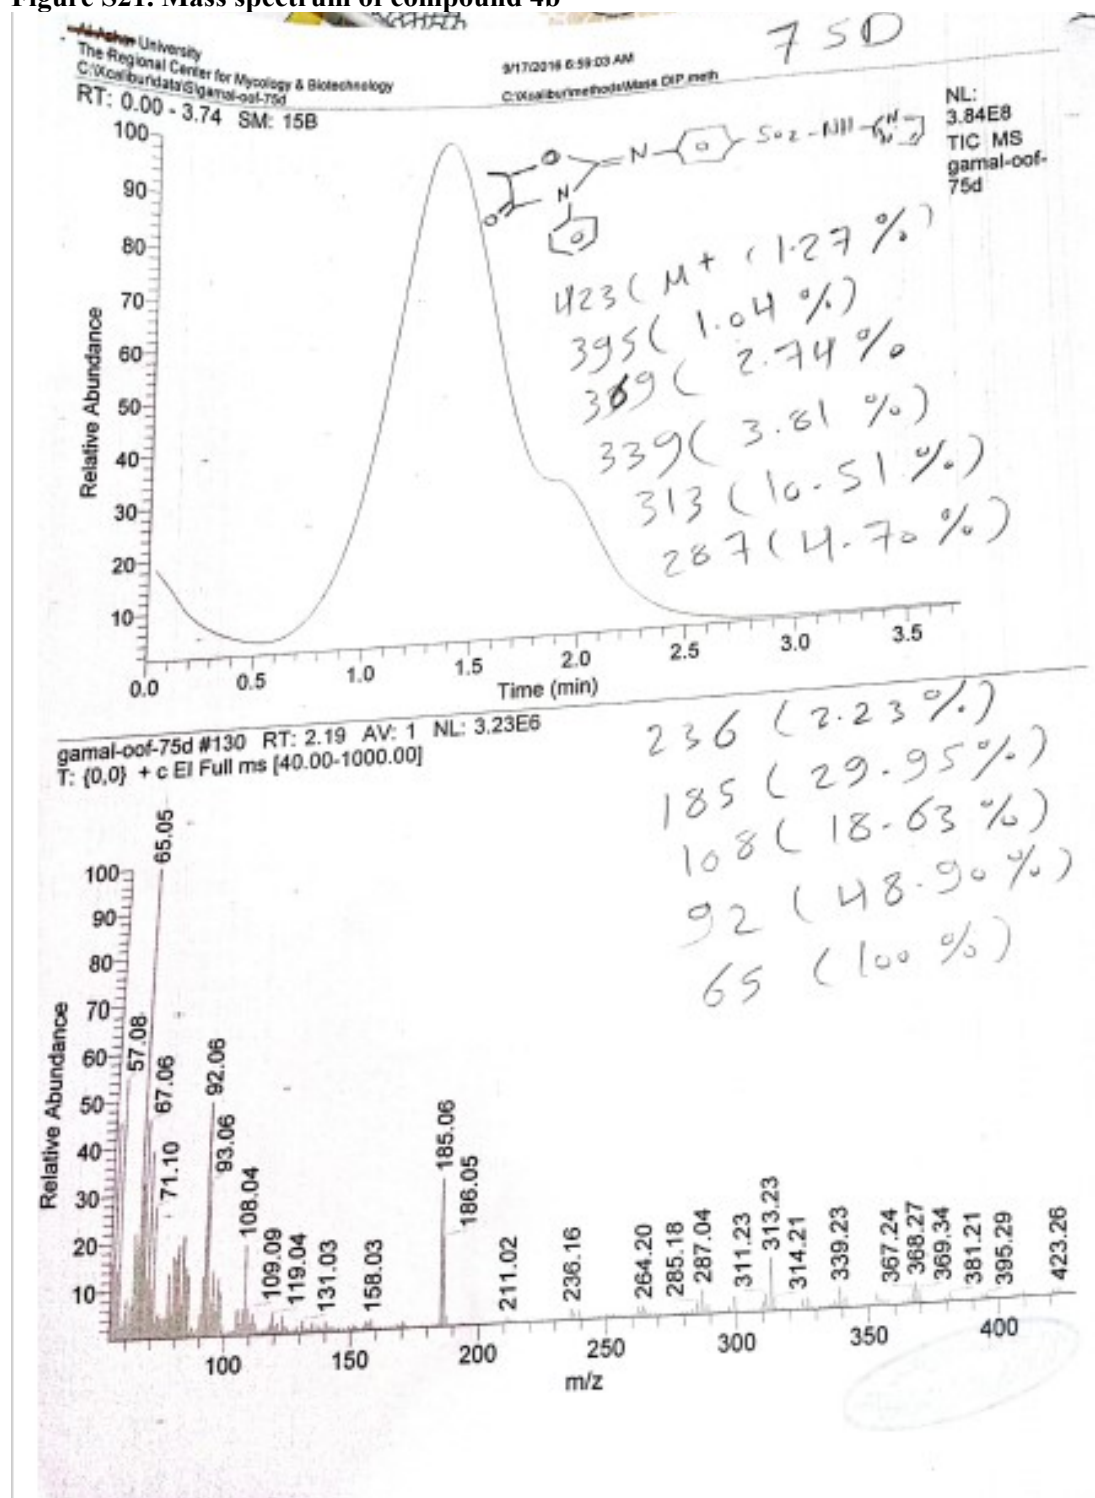



## Supplementary Information

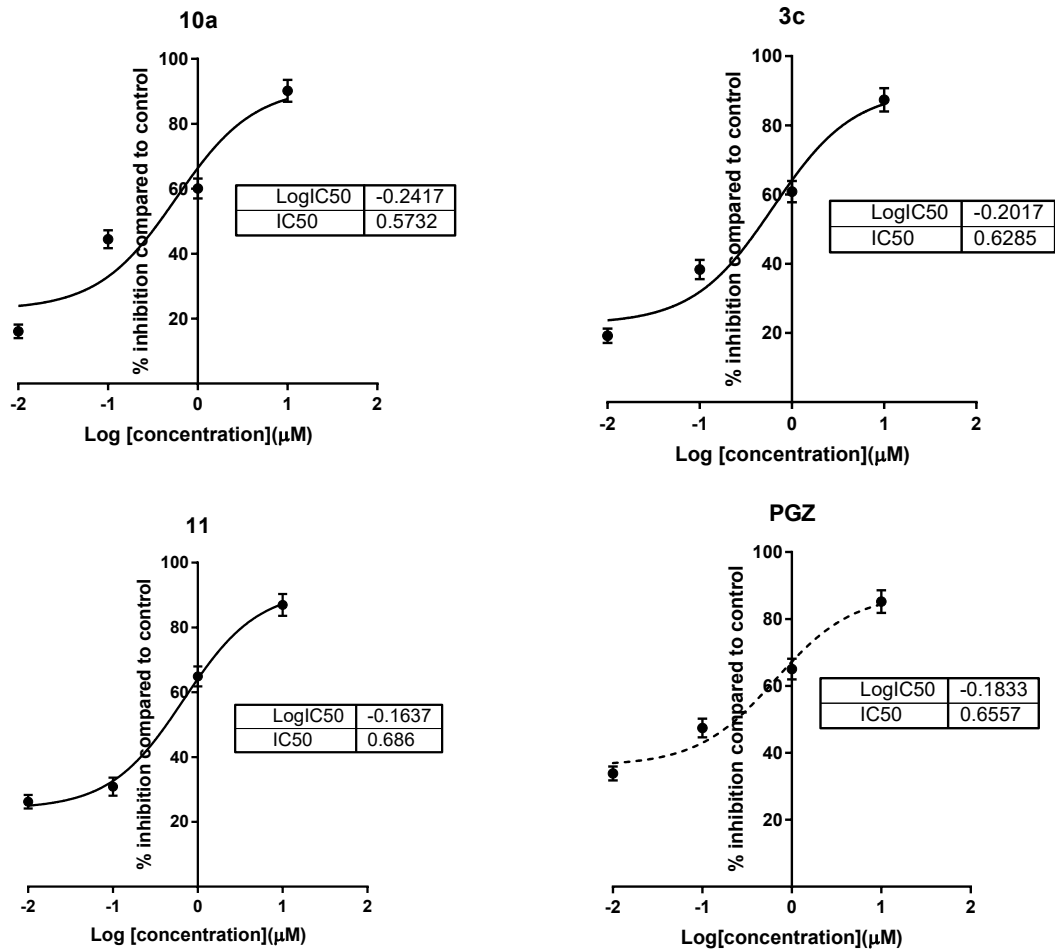

**Figure S22.** Dose-response curve for the PTB1B protein inhibition at the serial concentrations of 0.01-10 μM compared to pioglitazone (PGZ).

## Supplementary Information

(A)

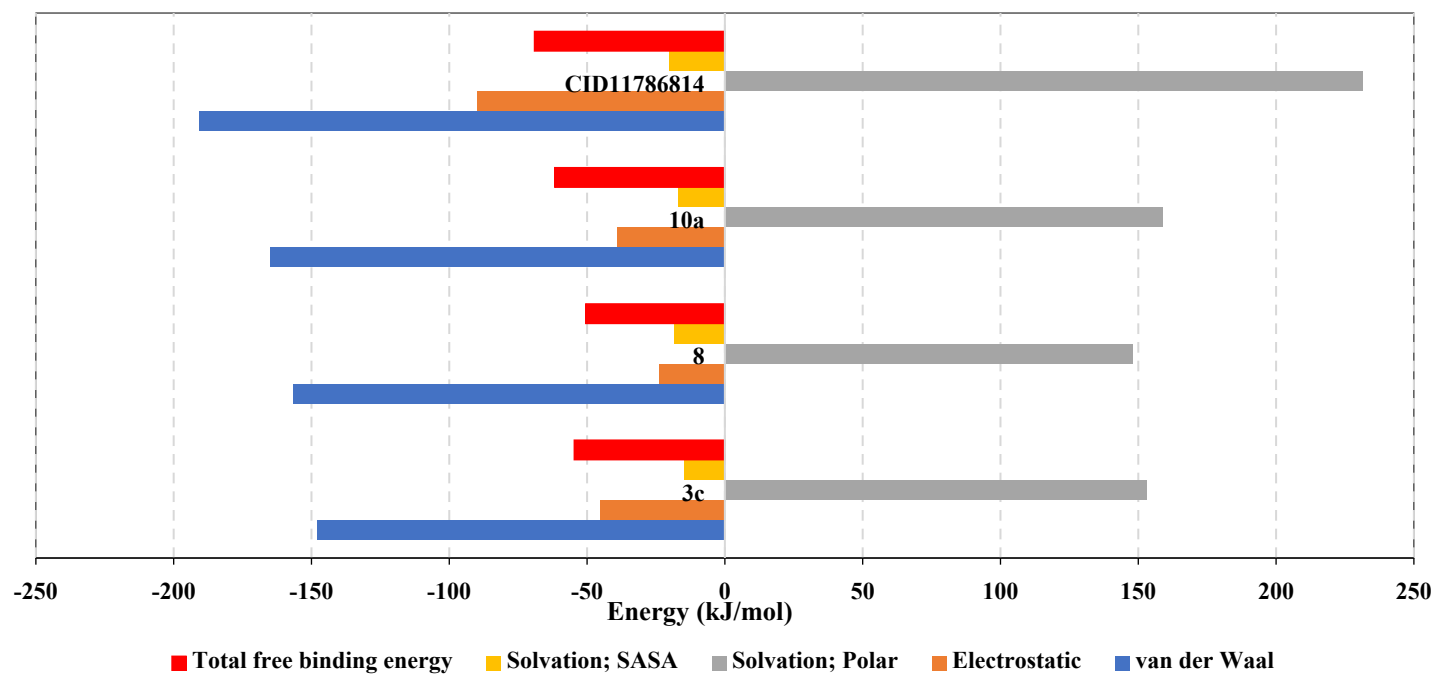

(B)

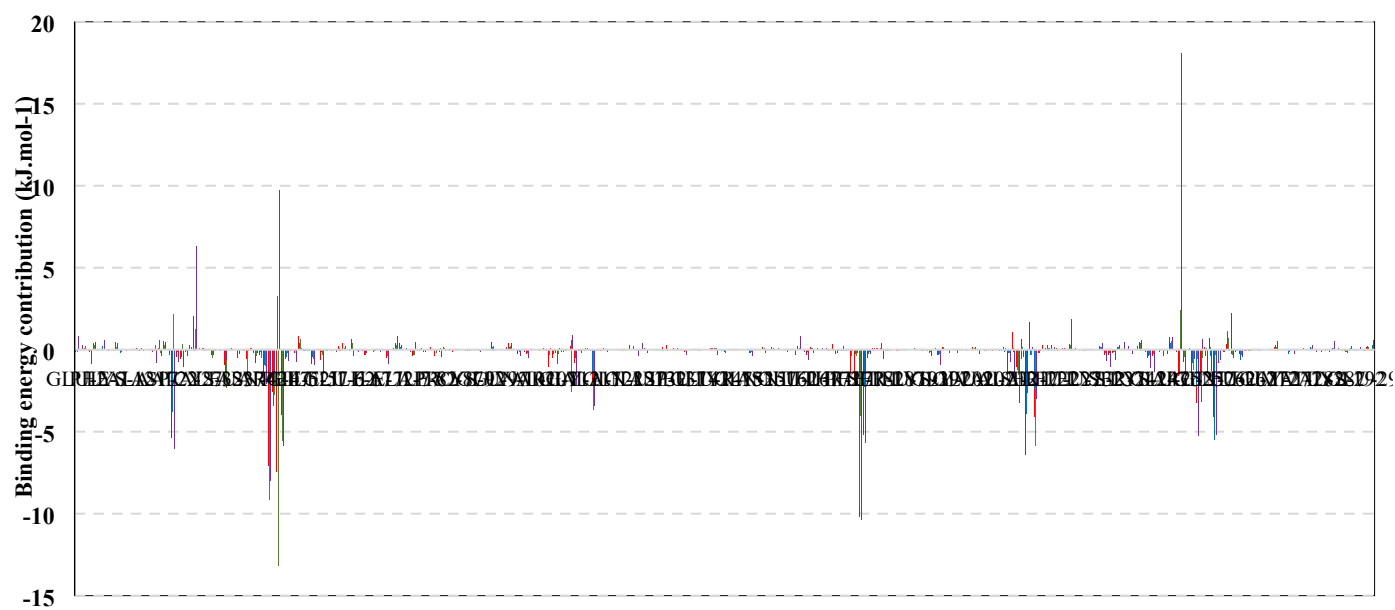

## Supplementary Information

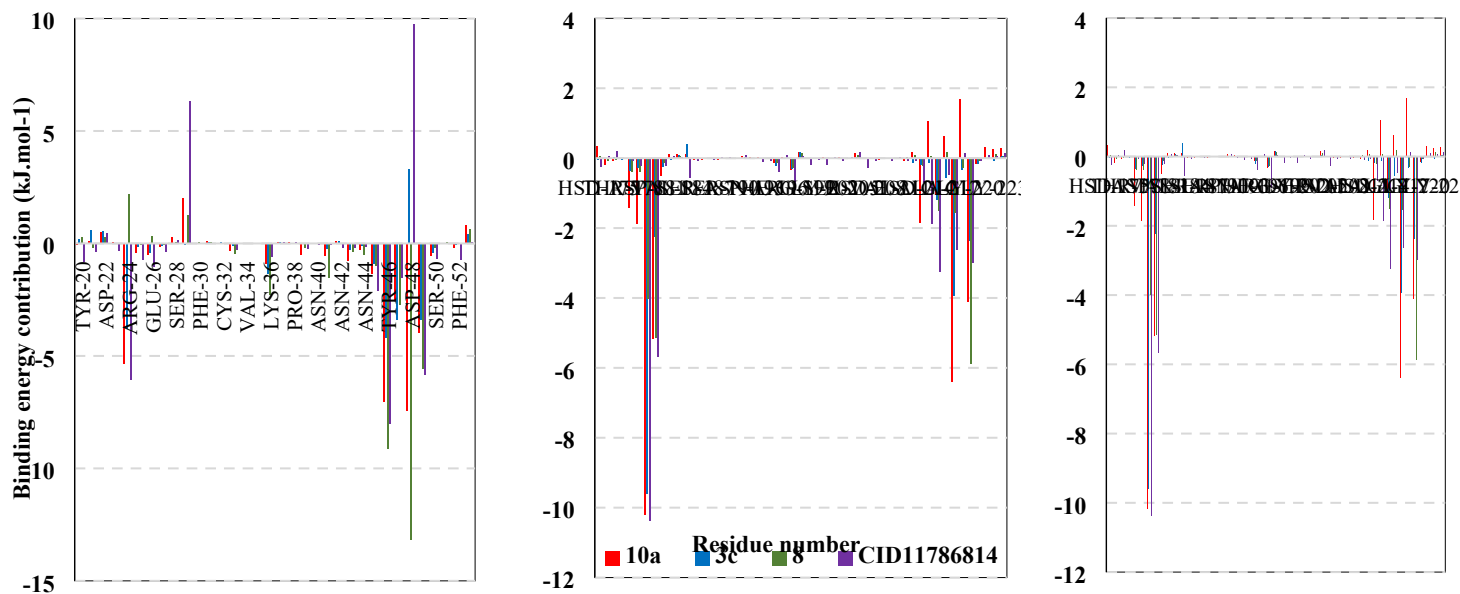

**Figure S23.** Binding-free energy of compound/PTP1B complexes as per MM\_PBSA calculations. (A) Total binding-free energies and constituting terms. (B) Residue-wise energy contributions; Lower panels are expanded views of upper panel illustrating PTP1B's secondary structural loop residue ranges; partial Tyr-P cleft/PTR-loop (left), WPD/P-loop (middle), and Tyr-P/Q-loop (right).

|                                | Size (d.nm):         | % Intensity: | St Dev (d.n...) |
|--------------------------------|----------------------|--------------|-----------------|
| <b>Z-Average (d.nm):</b> 135.2 | <b>Peak 1:</b> 170.9 | 100.0        | 92.19           |
| <b>PdI:</b> 0.181              | <b>Peak 2:</b> 0.000 | 0.0          | 0.000           |
| <b>Intercept:</b> 0.957        | <b>Peak 3:</b> 0.000 | 0.0          | 0.000           |
| <b>Result quality:</b> Good    |                      |              |                 |

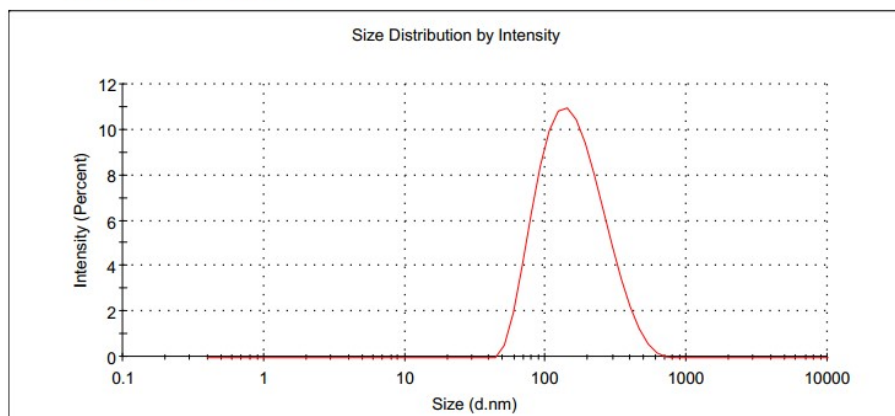

**Figure S24.** Chart of particle size and polydispersity index of the nano dispersion

## Supplementary Information

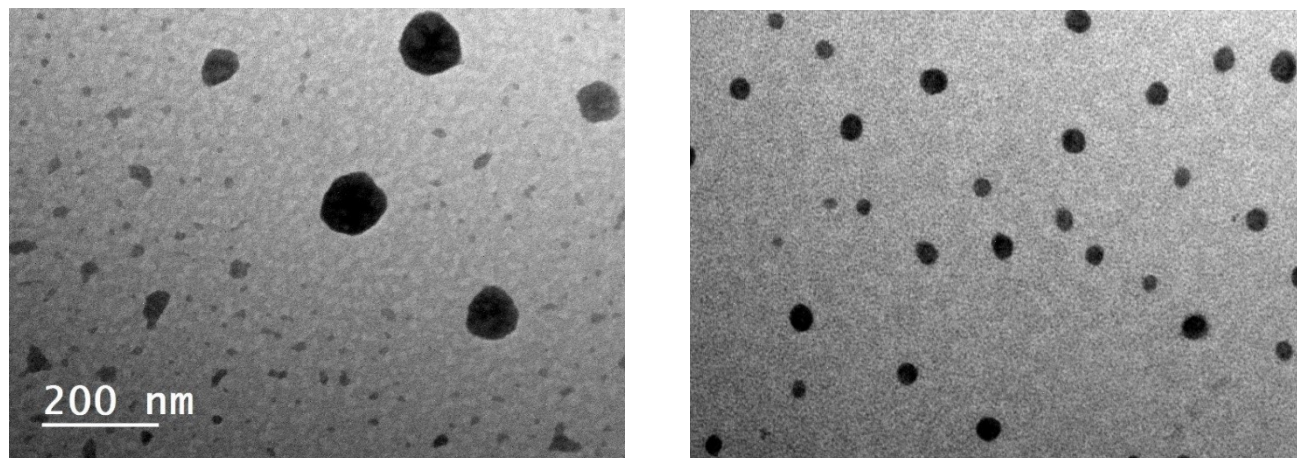

**Figure S25.** TEM imaging of the dispersion, showing on the left the size range suggested, on the right a wider display of the particle shape and uniformity.

## Supplementary Information

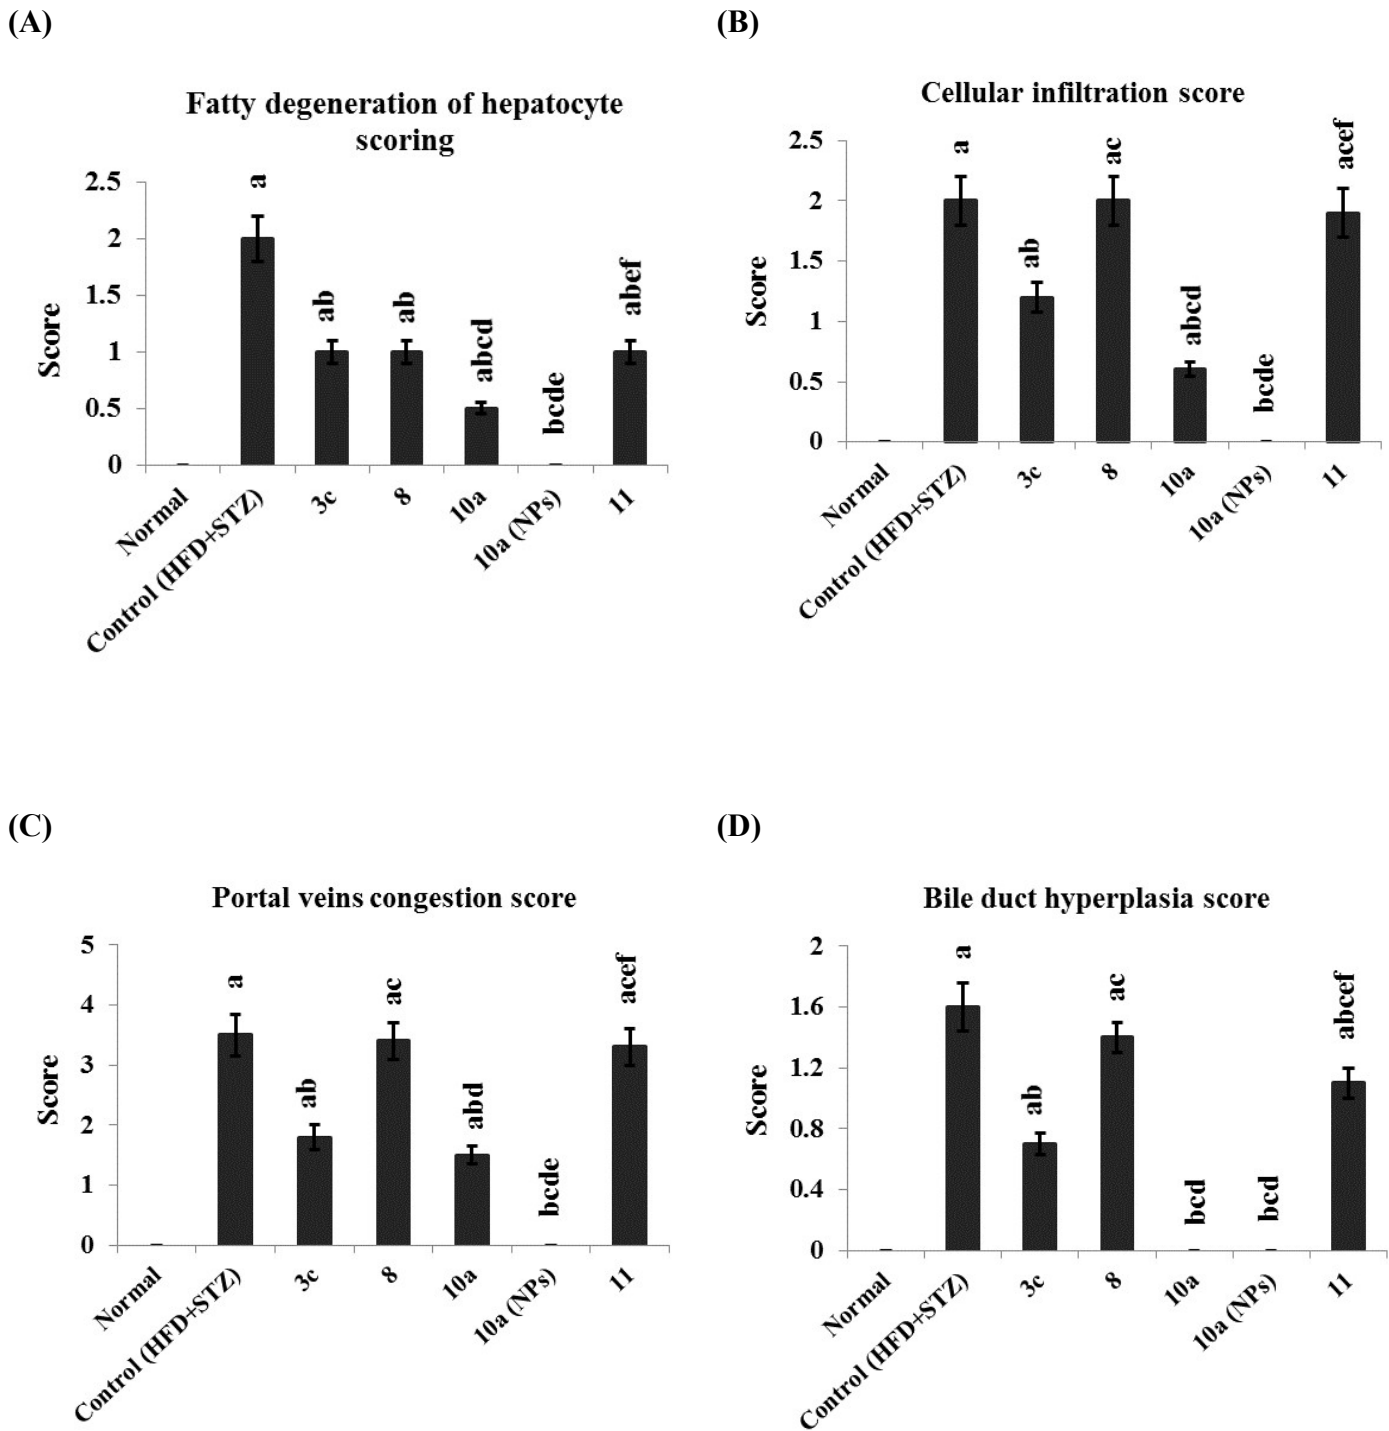

**Figure S26.** The microscopic damage score for liver of all experimental groups. A) fatty degeneration of hepatocytes scoring, B) cellular infiltration scoring, C) portal veins congestion scoring and D) bile duct hyperplasia scoring. Data are expressed as mean  $\pm$  SD and analyzed using one-way ANOVA followed by Bonferroni's post hoc test (n = 6-8). <sup>a</sup> significantly different at  $p < 0.05$  vs normal, <sup>b</sup> vs control (HFD+STZ), <sup>c</sup> vs 3c, <sup>d</sup> vs 8, <sup>e</sup> vs 10a, <sup>f</sup> vs 10a (NPs).

## Supplementary Information

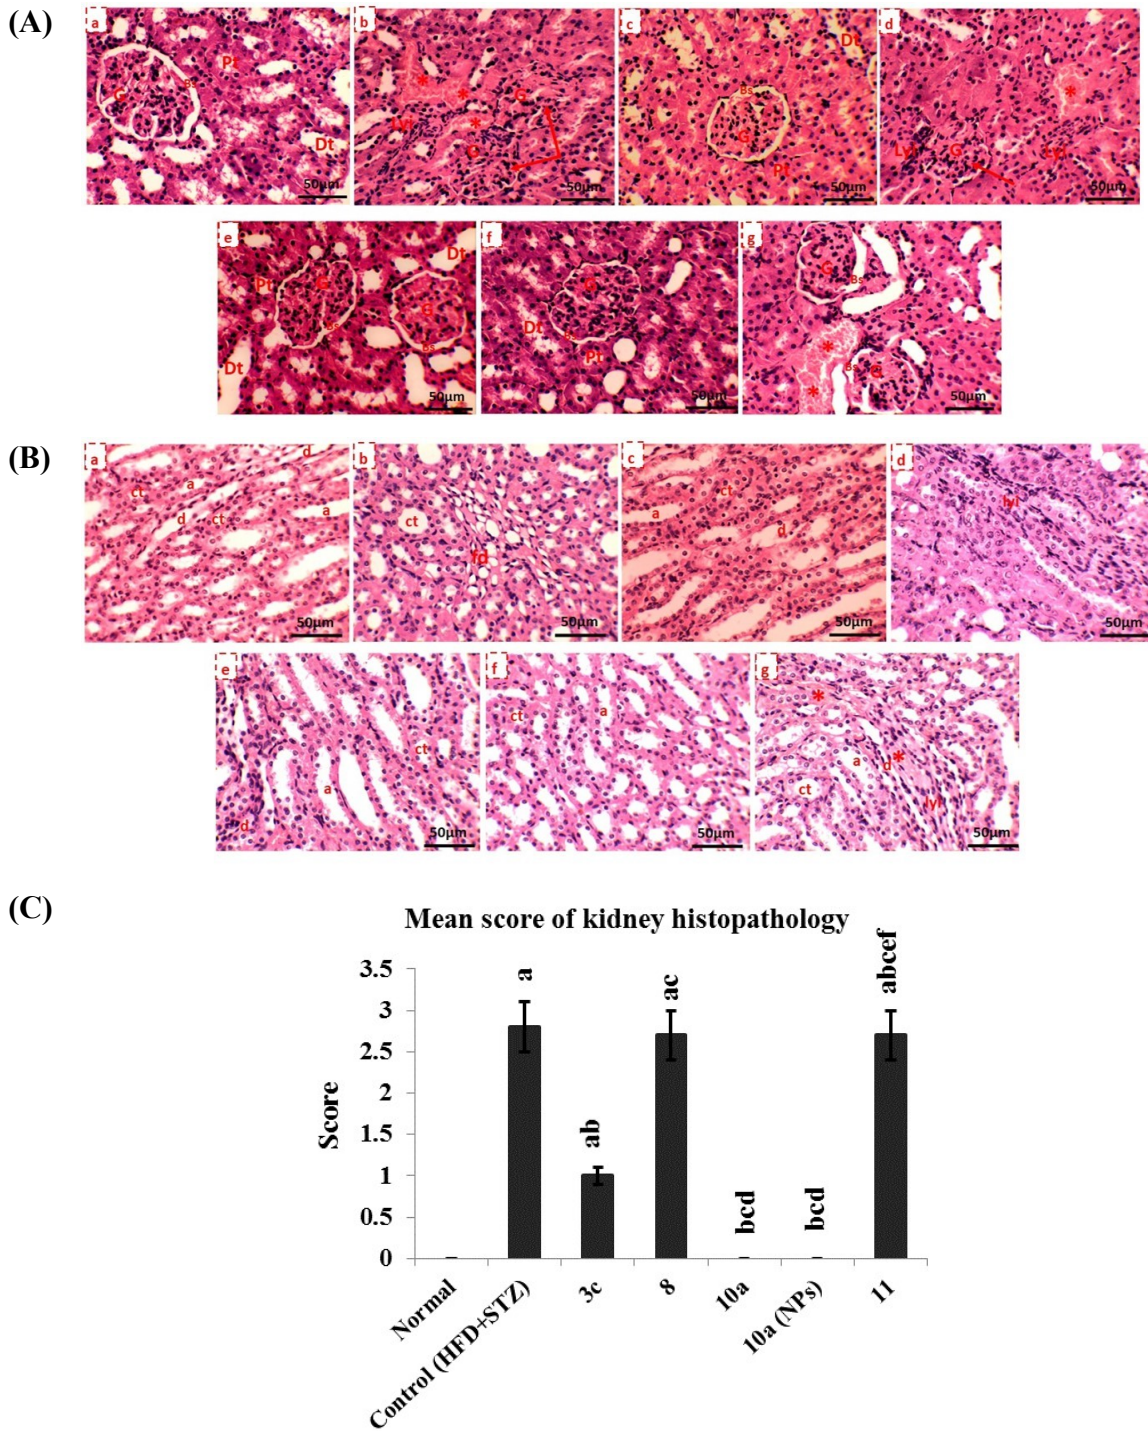

**Figure S27.** Results of kidney tissue histopathological examination. (A) area of renal cortex and (B) area of renal medulla of different experimental group showing a) Normal group with typical renal cortex and medulla structure, b) HFD+STZ-control group showed hypertrophy of glomerulus, infiltration of inflammatory cells and hemorrhage while the medullary region showed signs of tubular fatty changes, c) 3c-treated group showed completely restored renal cortical and medullary architecture with no evidence of histopathological changes, d) 8-treated group showed hypertrophy of glomerulus, infiltration of

## Supplementary Information

inflammatory cells and hemorrhage while the medullary region showed signs of cellular infiltration, e) **10a**-traeted group showed completely restored renal cortical and medullary architecture with no evidence of histopathological changes, f) **10a** (NPs)-treated group showed completely restored renal cortical and medullary architecture with no evidence of histopathological changes, g) **11**-treated group showed hypertrophy of glomerulus, infiltration of inflammatory cells and hemorrhage while the medullary region showed signs of infiltration of inflammatory cells and hemorrhage. (G) glomerulus, (Bs) Bouman space, (Pt) proximal tubules, (Dt) distal tubules, (Ct) collecting tubules, (a) thick segment of Henle loop, (d) thin segment of Henle loop, (\*) hemorrhage, (arrow) hypertrophy of glomerulus, (Lyi) infiltration of inflammatory cells, (fd) fatty degeneration. (C) Histopathology scoring of kidney cortical damage for all experimental groups. Data are expressed as mean  $\pm$  SD and analyzed using one-way ANOVA followed by Bonferroni's post hoc test (n = 6-8). <sup>a</sup> significantly different at  $p < 0.05$  vs normal, <sup>b</sup> vs control (HFD+STZ), <sup>c</sup> vs **3c**, <sup>d</sup> vs **8**, <sup>e</sup> vs **10a**, <sup>f</sup> vs **10a** (NPs).

## Supplementary Information

**Table S1.** Combining two different oils with surfactants were also investigated in as shown:

| Olive oil | Oleic acid | Tween 80 | Tween 20 |
|-----------|------------|----------|----------|
| 30 %      | 30 %       | 20 %     | 20 %     |
| 30%       | 30 %       | 40 %     |          |
| 30 %      | 30%        |          | 40 %     |

**Table S2.** Primer sequences used in the present study.

|                    | Primer Sequences                                                           | Annealing<br>Temp. | Accession NO. |
|--------------------|----------------------------------------------------------------------------|--------------------|---------------|
| <b>Leptin</b>      | Forward: 5`-GACATTTACACACGCAGTC-3`<br>Reverse: 5`-GAGGAGGTCTCGCAGGTT-3`    | 57°C               | NM_013076.3   |
| <b>Adiponectin</b> | Forward: 5`-AATCCTGCCCAGTCATGAAG-3`<br>Reverse: 5`-CATCTCCTGGGTCACCCTTA-3` | 56°C               | NM_144744.3   |
| <b>GAPDH</b>       | Forward: 5`-ATGACTCTACCCACGGCAAG-3`<br>Reverse: 5`-GATCTCGCTCCTGGAAGATG-3` | 56°C               | NM_017008.4   |

**Table S3.** The effect of the synthesized compounds on the markers of liver and kidney functions in the experimental rats.

|                           | ALT (IU/L)             | AST (IU/L)              | Serum creatinine<br>(mg/dL) | Serum urea<br>(mg/dL)  |
|---------------------------|------------------------|-------------------------|-----------------------------|------------------------|
| Normal                    | 22 ± 2                 | 64 ± 7                  | 0.4 ± 0.03                  | 22 ± 3                 |
| Control (HFD+STZ)         | 73 ± 8 <sup>a</sup>    | 223 ± 25 <sup>a</sup>   | 0.6 ± 0.09 <sup>a</sup>     | 58 ± 6 <sup>a</sup>    |
| Compound <b>3c</b>        | 34 ± 4 <sup>ab</sup>   | 99 ± 10 <sup>ab</sup>   | 0.5 ± 0.05                  | 35 ± 4 <sup>ab</sup>   |
| Compound <b>8</b>         | 41 ± 5 <sup>ab</sup>   | 128 ± 14 <sup>abc</sup> | 0.5 ± 0.06                  | 46 ± 5 <sup>abc</sup>  |
| Compound <b>10a</b>       | 34 ± 3 <sup>ab</sup>   | 99 ± 9 <sup>abd</sup>   | 0.5 ± 0.04                  | 31 ± 3 <sup>abd</sup>  |
| Compound <b>10a</b> (NPs) | 25 ± 3 <sup>bcde</sup> | 96 ± 9 <sup>abd</sup>   | 0.4 ± 0.04 <sup>b</sup>     | 23 ± 3 <sup>bcde</sup> |
| Compound <b>11</b>        | 34 ± 4 <sup>abf</sup>  | 104 ± 11 <sup>abd</sup> | 0.5 ± 0.05                  | 37 ± 4 <sup>abdf</sup> |

Data are expressed as mean ± SD and analyzed using one-way ANOVA followed by Bonferroni's post hoc test (n = 6-8). <sup>a</sup> significantly different at  $p < 0.05$  vs normal, <sup>b</sup> vs control (HFD+STZ), <sup>c</sup> vs **3c**, <sup>d</sup> vs **8**, <sup>e</sup> vs **10a**, <sup>f</sup> vs **10a** (NPs). NPs = nanoparticles; ALT = alanine aminotransferase; AST = aspartate aminotransferase.
